# Supplementary material
Source: PubMed Central journal article supplement (PMC3718567)
Supplement: NIHMS450107-supplement-01.pdf [file NIHMS450107-supplement-01.pdf]

## Aberrant HDAC2-Mediated Histone Modifications and Synaptic Plasticity in the Amygdala Predisposes to Anxiety and Alcoholism

### Supplemental Information

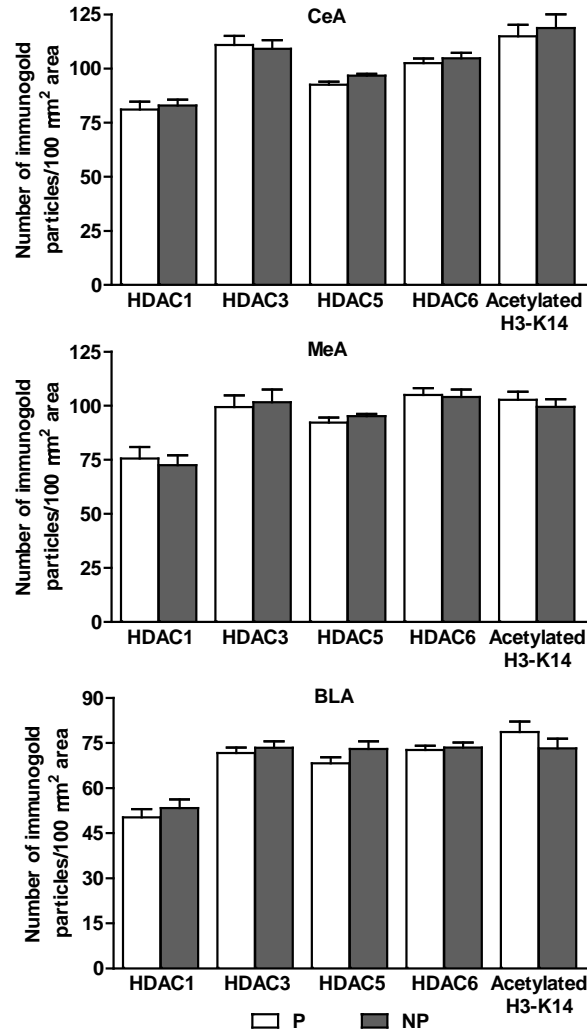

**Figure S1.** Bar diagram showing baseline protein levels of HDAC isoforms 1, 3, 5, and 6, and acetylated histone H3-K14 in the central amygdala (CeA), medial amygdala (MeA), and basolateral amygdala (BLA) of alcohol-preferring (P) and nonpreferring (NP) rats. The protein levels of the HDAC isoforms mentioned above and acetylated histone H3-K14 at baseline did not differ among the amygdaloid structures of P and NP rats. Values are represented as the mean  $\pm$  SEM of the number of immunogold particles per 100 mm<sup>2</sup> area of 6 rats per group.
